# Supplementary material
Source: Springer Nature journal article supplement (https://www.springermedizin.de/resource/supplementary/13002_2009_187_MOESM2_ESM.pdf/9627340)

# Mustang District

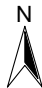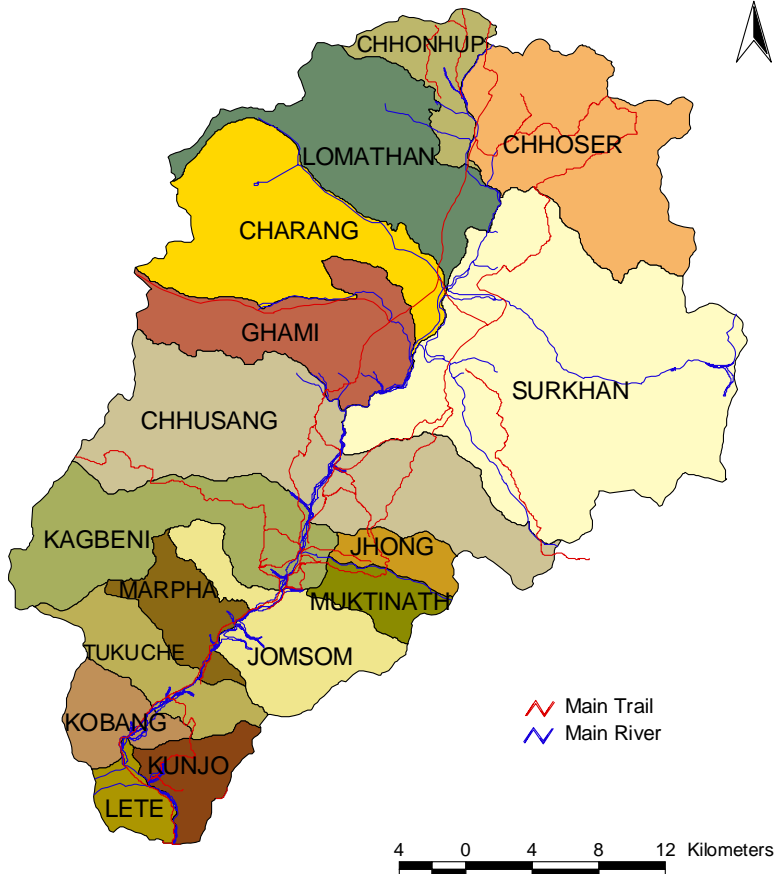

Supplement: MOESM2 [file 9627340]
